# Supplementary material
Source: HighWire-hosted journal article supplement (https://bmjopen.bmj.com/content/13/9/e048043)
Supplement: inline-supplementary-material-1 [file inline-supplementary-material-1.pdf]

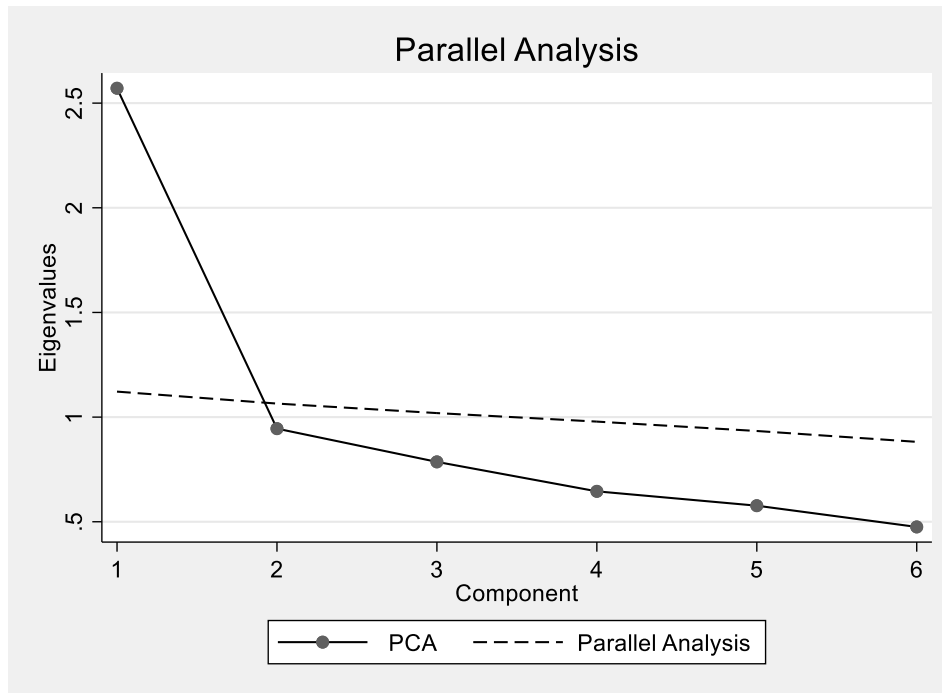

Supplementary Figure 1. Parallel analysis results.

*Supplementary Table 1. Mental health and well-being scale scores among women with and without probable mental disorder at baseline.*

|                                        | Probable<br>Mental<br>Disorder<br>(N=161)<br>Mean (Sd) | No probable<br>mental<br>disorder<br>(N=566)<br>Mean (Sd) | Total Sample<br>(N=727)<br>Mean (Sd) |
|----------------------------------------|--------------------------------------------------------|-----------------------------------------------------------|--------------------------------------|
| Psychological distress (K6)            | 18.8 (3.2)                                             | 15.9 (4.1)                                                | 16.6 (4.1)                           |
| Functional impairment (WHODAS)         | 31.6 (7.9)                                             | 21.3 (7.4)                                                | 23.6 (8.6)                           |
| Depression symptoms (PHQ-9)            | 19.7 (3.8)                                             | 13.9 (4.3)                                                | 15.2 (4.8)                           |
| Post-traumatic stress symptoms (PCL-6) | 26.5 (2.5)                                             | 20.7 (4.4)                                                | 22.0 (4.8)                           |
| Subjective well-being (WHO-5)          | 3.8 (3.8)                                              | 8.7 (5.0)                                                 | 7.6 (5.2)                            |
| Psychological flexibility (AAQ-II)     | 14.2 (6.0)                                             | 23.2 (7.9)                                                | 21.2 (8.4)                           |
| Standardized sum score                 | 5.0 (1.7)                                              | -1.4 (3.1)                                                | 0 (3.9)                              |
